# Supplementary material
Source: Springer Nature journal article supplement (https://www.springermedizin.de/resource/supplementary/12936_2012_2228_MOESM1_ESM.pdf/9542930)

Myanmar

Cambodia

Legend

-  Kanchanaburi
-  Mae Hong Son
-  Ranong
-  Tak
-  Trat
-  Ubon Ratchathani
-  Yala

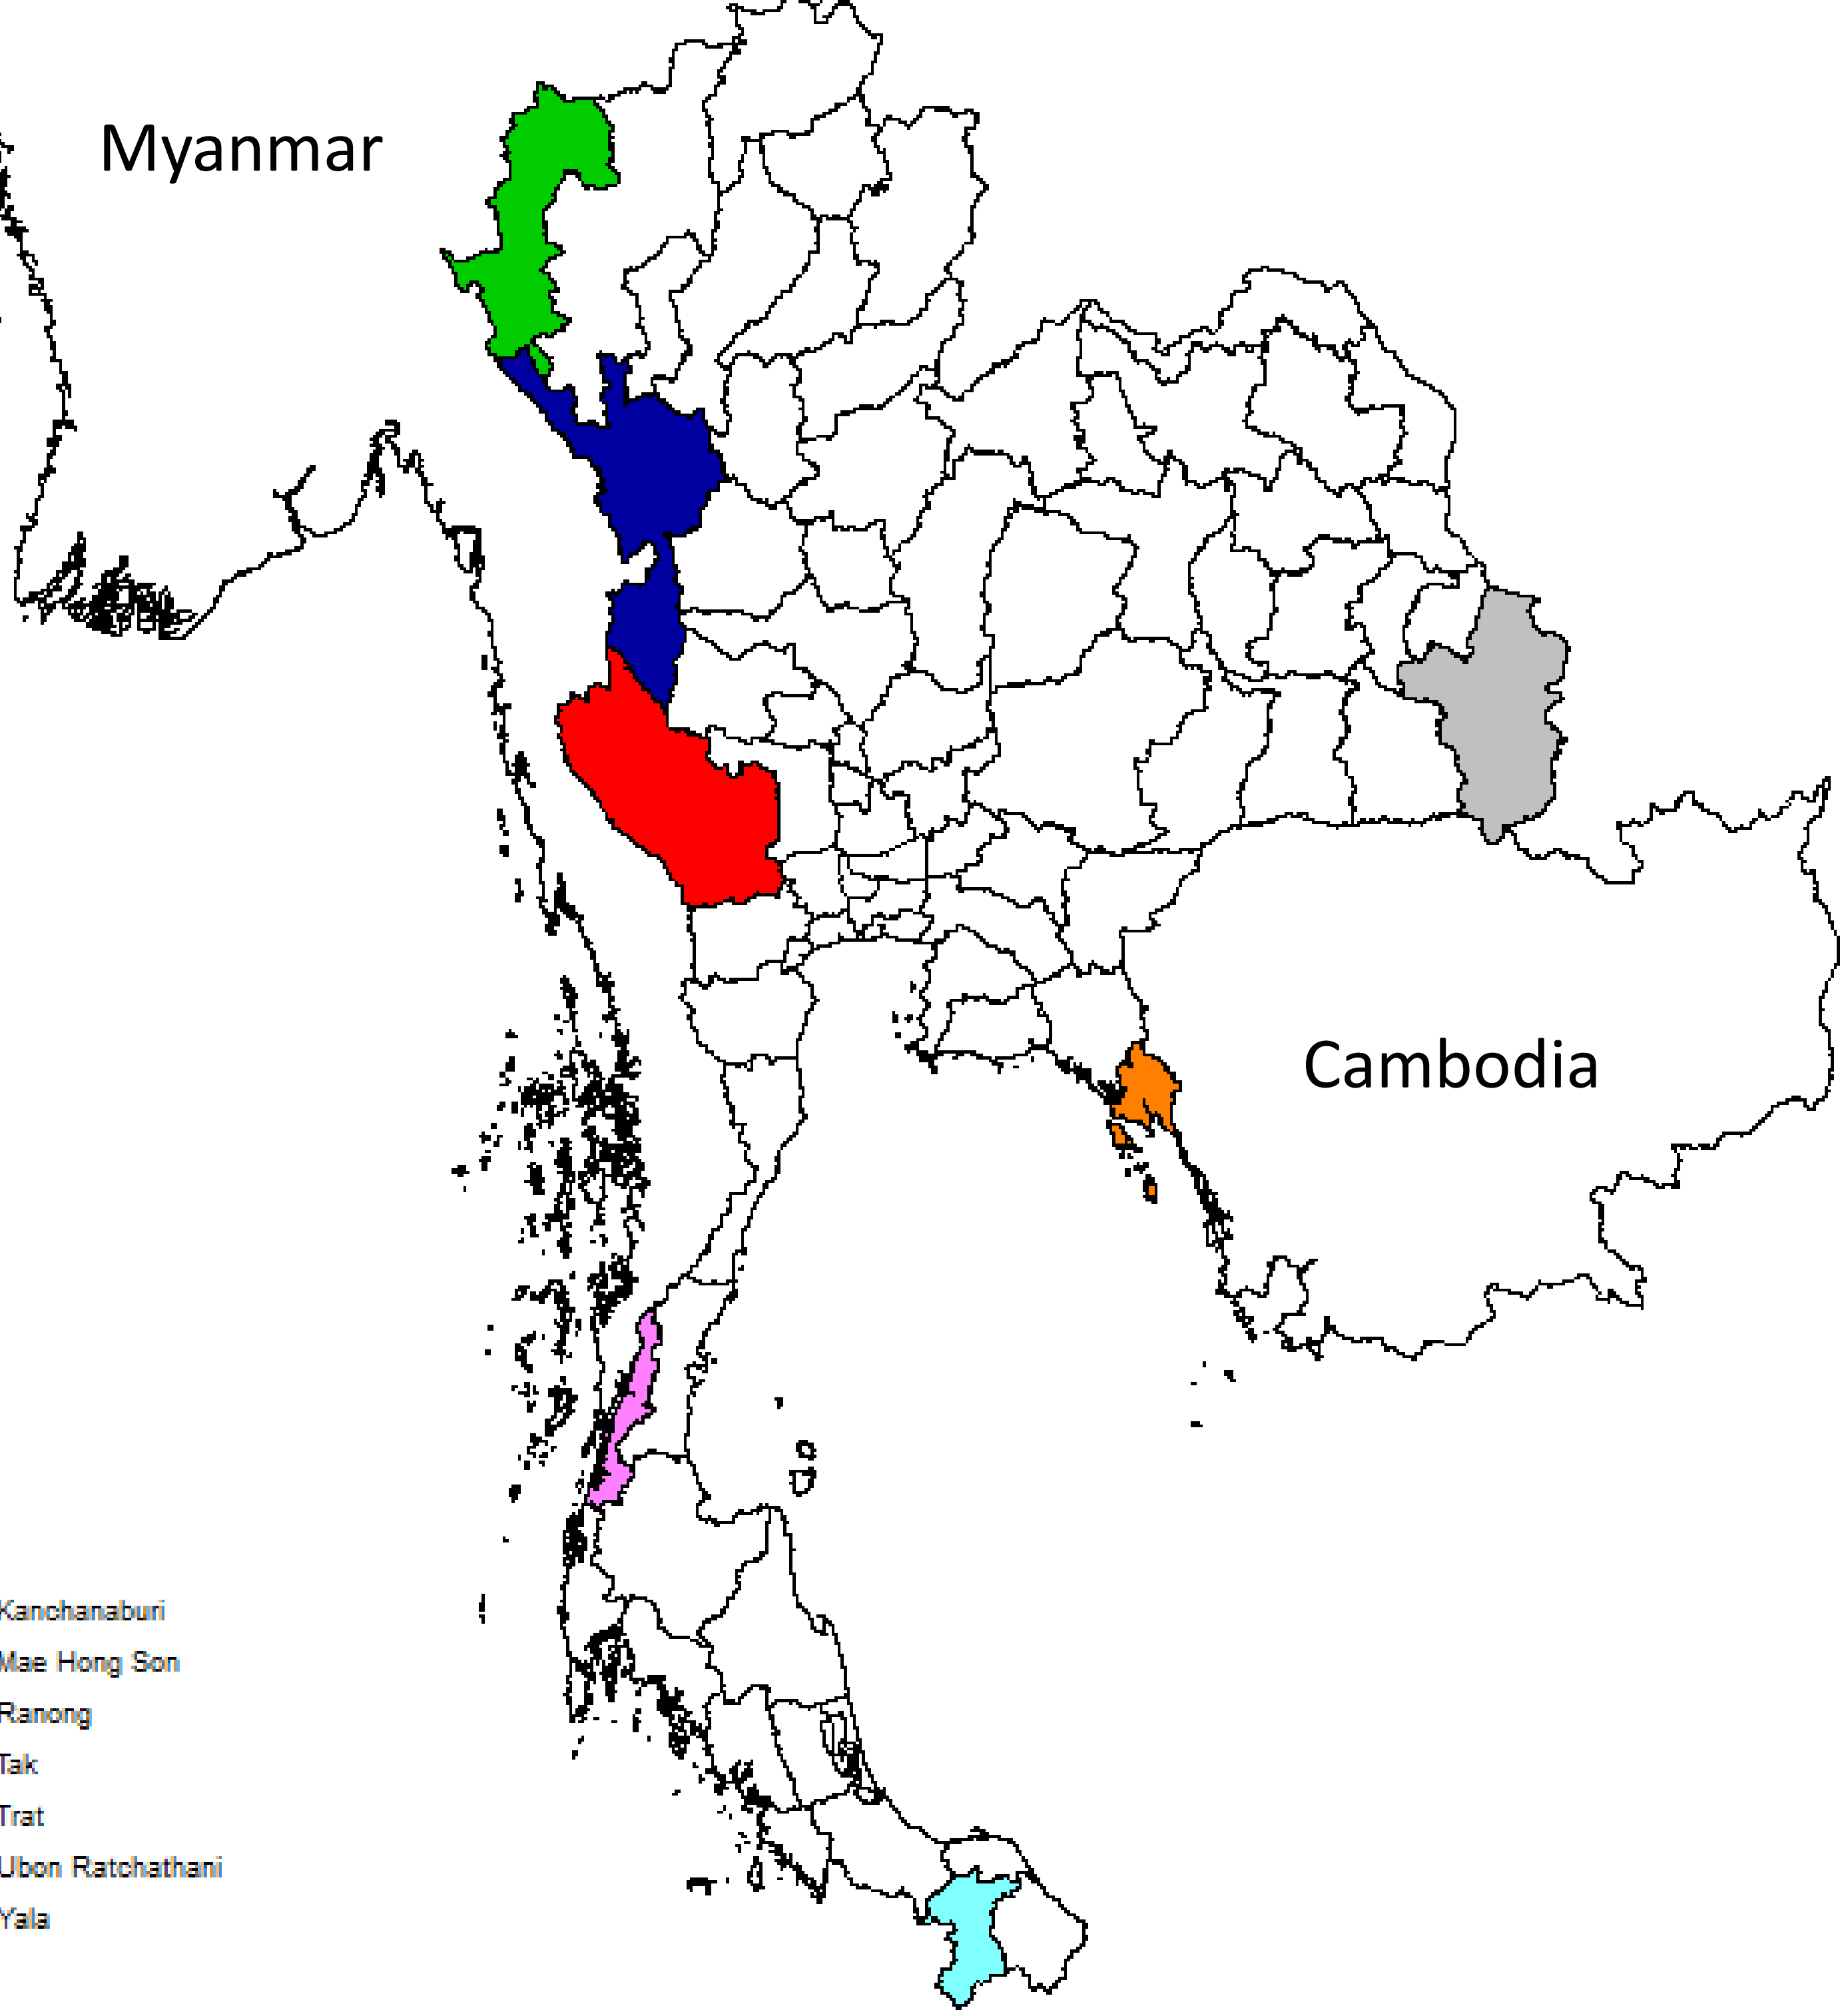

Supplement: MOESM1 [file 9542930]
